# Supplementary material for: Strong-LAMP: A LAMP Assay for Strongyloides spp. Detection in Stool and Urine Samples. Towards the Diagnosis of Human Strongyloidiasis Starting from a Rodent Model
Source: PubMed Central journal article supplement (PMC4945066; doi:10.1371/journal.pntd.0004836), 2016-07-14

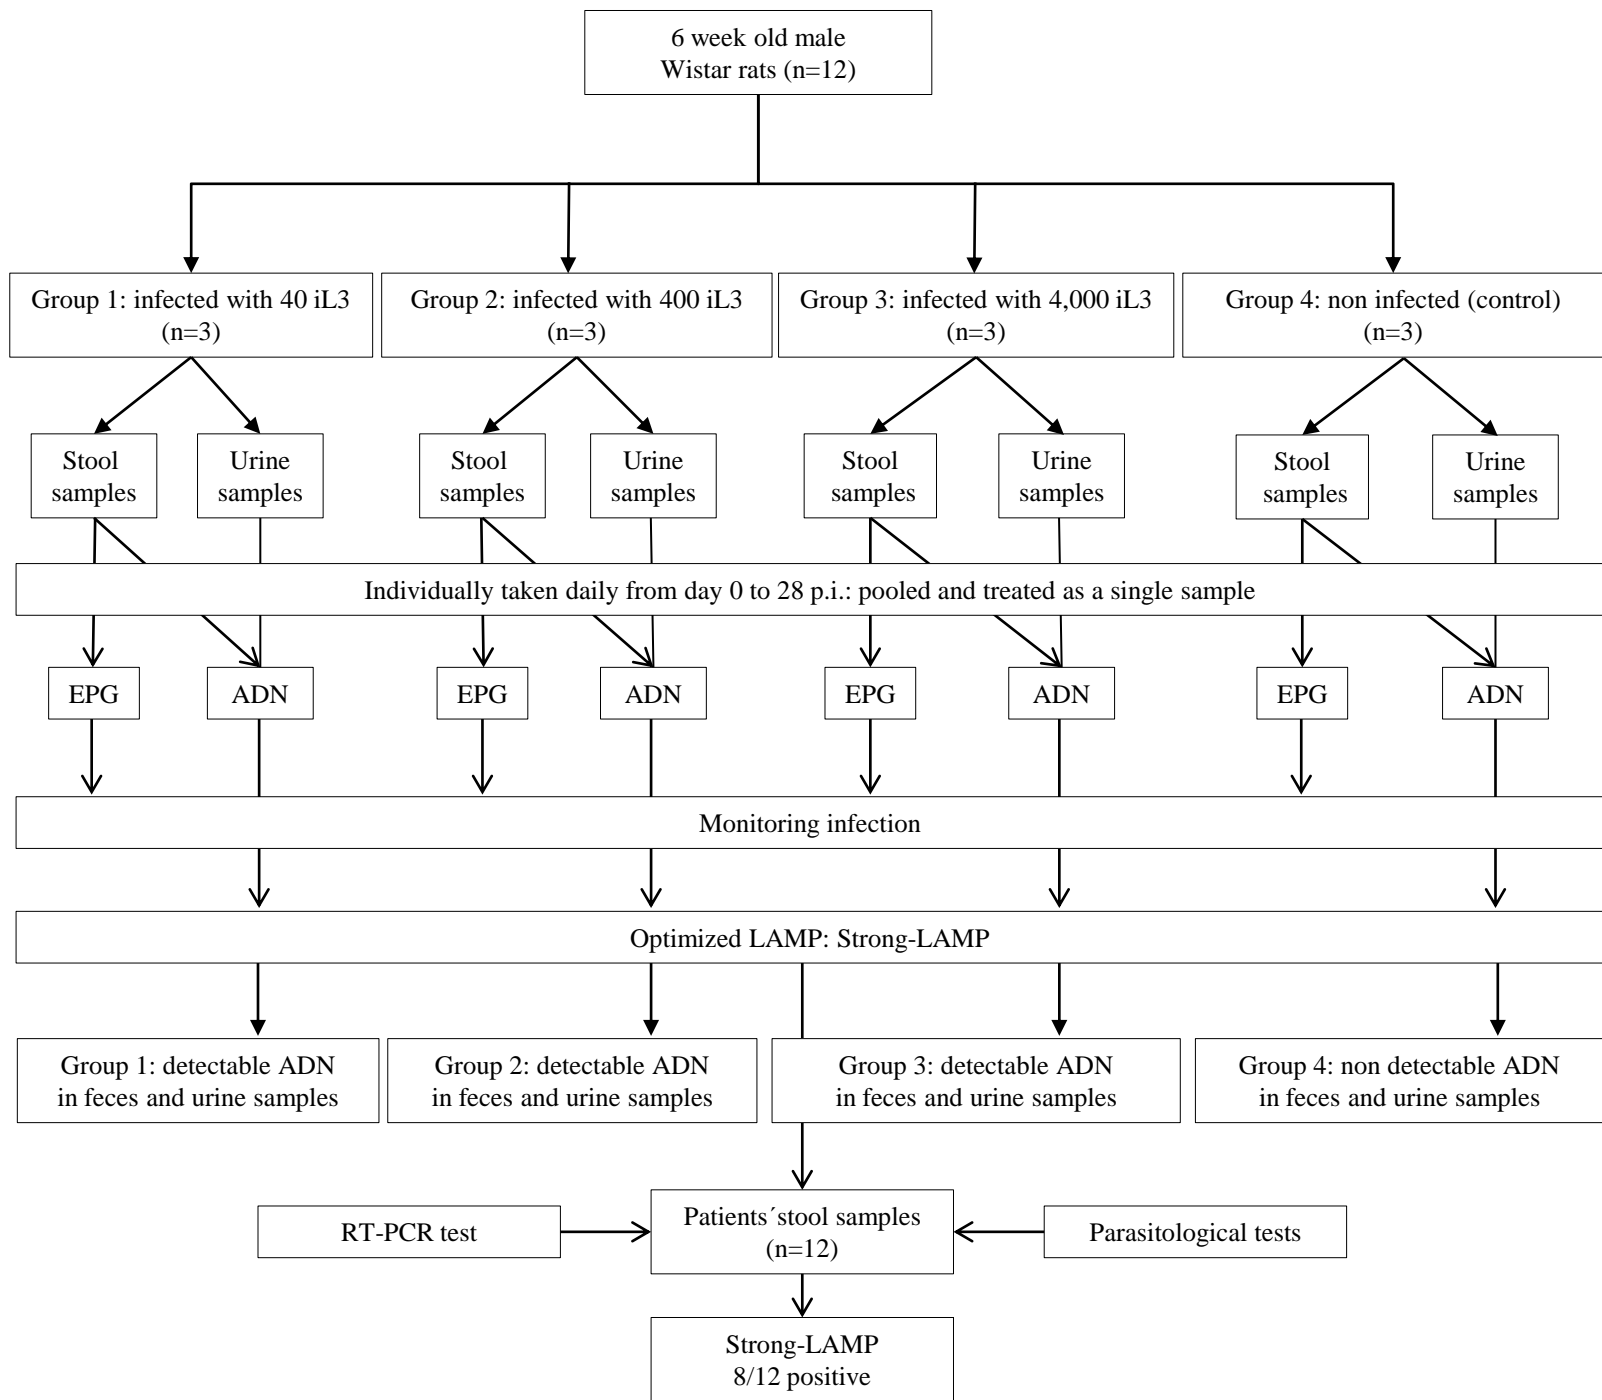

Supplement: pntd.0004836.s002.pdf [file pntd.0004836.s002.pdf]
